# Supplementary material
Source: publisher figshare collection journal article supplement (https://tandf.figshare.com/ndownloader/files/15249470)
Supplement: Supplementary file 1 [file 15249470]

**Annex 1. The translation of the questionnaire (original version in Romanian)**

**Q1. Sex**

- Male
- Female

**Q2. Age**

- 18-20
- 21-23
- 24-26
- >26 years old

**Q3. What study program do you attend at the university?**

**Q4. What year are you currently in at university?**

**Q5. Do you suffer from any ophthalmological disease?**

- No
- Yes (please specify)

**Q6. Do you suffer from any chronical disease?**

- No
- Yes (please specify)

**Q7. Do you have any family history of chronic diseases?**

- Eye diseases
- Respiratory diseases
- Cardiovascular diseases
- Metabolic diseases
- Cancer history
- Others (please specify)

**Q8. Do you wear glasses?**

- Yes
- No

**Q9. When did you perform your last ophthalmological control?**

- During the last 6 months
- 6-12 months ago
- 1-2 years ago
- Never

**Q10. How many hours a day do you work on the computer?**

- 0-4 hours
- 5-10 hours
- >10 hours

**Q11. Do you wear protection glasses when you use your computer?**

- Yes
- No

**Q12. Please tick if you have experienced the following symptoms related to computer use:**

- Eye fatigue
- Dry eyes
- Itching
- Red, swollen eyes
- Migraine
- Forehead pain above eyebrow
- Increased sensitivity to light
- Burning sensation
- Eyelid spasms
- Spasms of ocular muscles
- Others, please specify

**Q13. Tick if, when working at the computer or reading, you had any of the symptoms**

- Temporary blurred vision after some time spent reading
- If reading is interrupted for a few moments, take breaks and rest your eyes by looking away from the book, reading is resumed but the symptoms recur
- Second-half-of-the-day-headache
- Fatigue after reading or working at the computer
- Dizziness after working on the computer
- Watery eyes, dye eyes sensation or itching
- Avoidance of near visual work
- Closing one eye during reading
- Double vision when reading ("the words run together")
- Learning difficulties
- Slow reading
- Difficulties in completing tasks on time

**Q14. Tick if you use any of the following methods to prevent eye fatigue**

- Ensure natural lighting
- Apply an anti*-*glare screen protector
- Take breaks and rest your eyes by looking away from the screen or the book you are reading
- Blink more often
- Perform different types of eye exercises to strengthen the eye muscles
